# Supplementary material for: Rationalizing the effect of benzo-fusion at [a] and [b] positions of BODIPY on fluorescence yields
Source: Royal Society of Chemistry journal article supplement (doi:10.1039/d1cp03160k), 2021-01-01
Supplement: d1cp03160k1.pdf [file d1cp03160k1.pdf]

## Supporting Information

### **Rationalizing the effect of benzo-fusion at [a] and [b] position of BODIPY on fluorescence yields**

Na Xu, Yao Xiao, Zhigang Ni,\* Lizhi Gai, Zhikuan Zhou, and Hua Lu\*

Key Laboratory of Organosilicon Chemistry and Material Technology of Ministry of Education, College of Material, Chemistry and Chemical Engineering, Hangzhou Normal University, No. 2318, Yuhangtang Road, Hangzhou 311121, P. R. China.

Email: nizhigang@hznu.edu.cn; hualu@hznu.edu.cn.

|                                                                         |             |
|-------------------------------------------------------------------------|-------------|
| <b>1. Experimental Section</b> .....                                    | S3          |
| <b>2. Spectroscopic Data</b> .....                                      | S4          |
| <b>3. DFT and TD-DFT Calculations</b> .....                             | S5-S6       |
| <b>4. Singlet Oxygen Efficiency</b> .....                               | S7          |
| <b>5. NTO analyses</b> .....                                            | S8          |
| <b>6. <sup>1</sup>H NMR, <sup>13</sup>C NMR and HR-MS Spectra</b> ..... | S9-S11      |
| <b>7. Cartesian coordinates</b> .....                                   | S12-<br>S18 |

## 1. Experimental Section

**General.** All reactions were carried out under argon atmosphere. All reagents were purchased from common suppliers and used as received. All yields given referred to isolated yields.  $^1\text{H}$  NMR and  $^{13}\text{C}$  NMR spectra were recorded on a Bruker DRX400 spectrometer, and referenced to the residual proton signals of deuterated solvents.  $^1\text{H}$  NMR chemical shifts were referenced to  $\text{CDCl}_3$  (7.26 ppm).  $^{13}\text{C}$  NMR chemical shifts were referenced to  $\text{CDCl}_3$  (77.16 ppm). ESI–HRMS spectra were recorded on Bruker Daltonics Apex-III. MALDI–TOF–MS were performed on a microflex MALDI-TOF (Bruker Daltonics, USA) Spectrometer. UV-vis spectra were obtained by a Shimadzu UV-1800 spectrophotometer. Fluorescence spectra and the fluorescence lifetimes of the samples were recorded on a HORIBA JobinYvon Fluorolog-3 spectrofluorimeter.

## 2. Spectroscopic data

**Table S1.** Photophysical properties of BODIPY **1-5** in solvents with various polarities.

|                         | Solvent | $\lambda_{\text{abs}}$<br>[nm] | $\lambda_{\text{em}}$<br>[nm] | $\Delta\nu_{\text{abs-em}}$<br>[cm <sup>-1</sup> ] | $\tau$<br>[ns]      | $\Phi$ | $k_{\text{r}}$<br>[10 <sup>8</sup> ]/s | $k_{\text{nr}}$<br>[10 <sup>8</sup> ]/s |
|-------------------------|---------|--------------------------------|-------------------------------|----------------------------------------------------|---------------------|--------|----------------------------------------|-----------------------------------------|
| <b>1</b> <sup>[a]</sup> | DCM     | 631                            | 664                           | 788                                                | 5.2                 | 0.93   | 1.79                                   | 0.13                                    |
|                         | THF     | 631                            | 651                           | 487                                                | n.a. <sup>[e]</sup> | 0.64   | -                                      | -                                       |
| <b>2</b> <sup>[b]</sup> | Hexane  | 599                            | 605                           | 176                                                | 5.71                | 0.91   | 1.59                                   | 0.16                                    |
|                         | THF     | 600                            | 609                           | 217                                                | 5.26                | 0.99   | 1.89                                   | 0.02                                    |
|                         | MeCN    | 597                            | 606                           | 241                                                | 5.63                | 0.87   | 1.55                                   | 0.2                                     |
| <b>3</b> <sup>[c]</sup> | DCM     | 568                            | n.d. <sup>[d]</sup>           | -                                                  | -                   | -      | -                                      | -                                       |
|                         | Hexane  | 556                            | n.d.                          | -                                                  | -                   | -      | -                                      | -                                       |
|                         | Toluene | 567                            | n.d.                          | -                                                  | -                   | -      | -                                      | -                                       |
| <b>4</b>                | DCM     | 560                            | n.d.                          | -                                                  | -                   | -      | -                                      | -                                       |
|                         | THF     | 558                            | n.d.                          | -                                                  | -                   | -      | -                                      | -                                       |
|                         | MeCN    | 550                            | n.d.                          | -                                                  | -                   | -      | -                                      | -                                       |
| <b>5</b>                | Hexane  | 557                            | n.d.                          | -                                                  | -                   | -      | -                                      | -                                       |
|                         | Toluene | 567                            | n.d.                          | -                                                  | -                   | -      | -                                      | -                                       |
|                         | DCM     | 560                            | n.d.                          | -                                                  | -                   | -      | -                                      | -                                       |
|                         | THF     | 559                            | n.d.                          | -                                                  | -                   | -      | -                                      | -                                       |
|                         | MeCN    | 551                            | n.d.                          | -                                                  | -                   | -      | -                                      | -                                       |

[a] Y. Tomimori, T. Okujima, T. Yano, S. Mori, N. Ono, H. Yamada, H. Uno, *Tetrahedron*, 67 (2011) 3187-3193.

[b] Z. Shen, H. Röhr, K. Rurack, H. Uno, M. Spieles, B. Schulz, G. Reck, N. Ono, *Chem. Eur. J.*, 10 (2004) 4853-

4871. [c] Y. Ni, W. Zeng, K.-W. Huang, J. Wu, *Chem. Commun.*, 49 (2013) 1217-1219. [d] not detect. [e] not

available.

### 3. DFT and TD-DFT Calculations

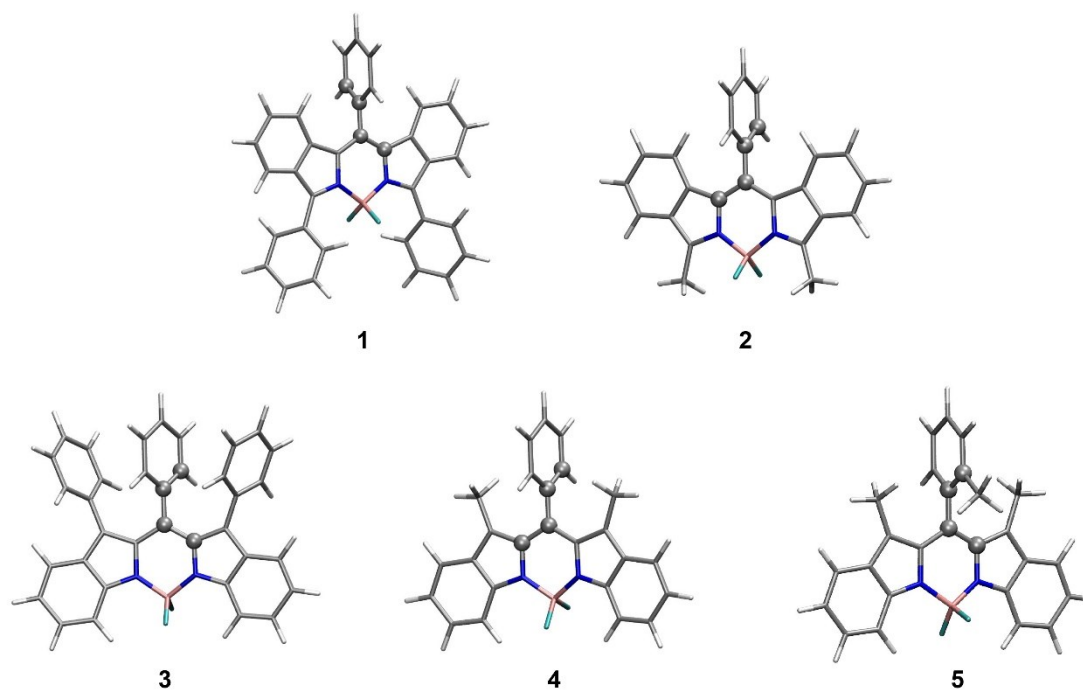

**Fig. S1.** Optimized geometries of the  $S_0$  state. The atoms for defining the dihedral angle used in the potential energy surface (PES) scan are highlighted in the CPK mode.

**Table S2.** Dihedral angles, excitation energies, and oscillator strengths of the local minima on the PESs of the  $S_1$  state of **3** and **4**.

| Compound | local minimum | optimized dihedral angle ( $^\circ$ ) | excitation energy (eV) | $f$   |
|----------|---------------|---------------------------------------|------------------------|-------|
| <b>3</b> | <b>A</b>      | 57.4                                  | 1.43                   | 0.034 |
|          | <b>B</b>      | 122.6                                 | 1.46                   | 0.035 |
|          | <b>C</b>      | 171.4                                 | 0.89                   | 0.017 |
| <b>4</b> | <b>D</b>      | -112.7                                | 1.47                   | 0.013 |
|          | <b>E</b>      | 7.3                                   | 0.77                   | 0.003 |

**Table S3.** Energy levels of  $S_1$  and  $T_n$  ( $n = 1 \sim 4$ ) states and contributions of MO transitions.

| Compound | state | $n$ -th | energy (eV) | MO transition                                     |
|----------|-------|---------|-------------|---------------------------------------------------|
| 1        | $S_n$ | 1       | 2.16        | H→L (98.6%)                                       |
|          | $T_n$ | 1       | 0.88        | H→L (97.5%)                                       |
|          |       | 2       | 2.43        | H→L+1 (65.7%)<br>H-1→L (20.1%)                    |
|          |       | 3       | 2.80        | H-1→L (66.5%)<br>H→L+1 (19.5%)                    |
|          |       | 4       | 2.89        | H→L+2 (35.0%)<br>H-2→L (31.5%)                    |
| 2        | $S_n$ | 1       | 2.41        | H→L (98.2%)                                       |
|          | $T_n$ | 1       | 0.99        | H→L (97.6%)                                       |
|          |       | 2       | 2.56        | H→L+1 (66.6%)<br>H-1→L (17.1%)                    |
|          |       | 3       | 2.87        | H→L+2 (50.4%)<br>H-2→L (26.5%)<br>H-1→L+1 (11.3%) |
|          |       | 4       | 3.06        | H-1→L (67.5%)<br>H→L+1 (17.6%)                    |
| 3        | $S_n$ | 1       | 1.43        | H→L (95.3%)<br>H-1→L (2.9%)                       |
|          | $T_n$ | 1       | 0.69        | H→L (86.9%)<br>H-1→L (9.3%)                       |
|          |       | 2       | 1.23        | H-1→L (84.4%)<br>H→L (8.6%)                       |
|          |       | 3       | 1.69        | H-2→L (94.7%)<br>H-1→L (1.5%)                     |
|          |       | 4       | 2.27        | H-3→L (86.0%)                                     |
| 4        | $S_n$ | 1       | 1.47        | H→L (95.4%)<br>H-1→L (3.3%)                       |
|          | $T_n$ | 1       | 0.69        | H→L (82.6%)<br>H-1→L (13.7%)                      |
|          |       | 2       | 1.28        | H-1→L (76.9%)<br>H→L (12.6%)                      |
|          |       | 3       | 1.73        | H-2→L (91.1%)<br>H-1→L (5.6%)                     |
|          |       | 4       | 2.69        | H-3→L (77.3%)<br>H-6→L (10.7%)                    |
| 5        | $S_n$ | 1       | 1.51        | H→L (95.1%)<br>H-1→L (3.5%)<br>H-2→L (1.0%)       |
|          | $T_n$ | 1       | 0.70        | H→L (82.1%)<br>H-1→L (14.2%)                      |
|          |       | 2       | 1.28        | H-1→L (77.1%)<br>H→L (13.1%)<br>H-2→L (5.0%)      |
|          |       | 3       | 1.75        | H-2→L (91.8%)<br>H-1→L (4.9%)<br>H→L (1.0%)       |
|          |       | 4       | 2.74        | H-4→L (51.9%)<br>H-6→L (26.0%)<br>H-3→L (13.2%)   |

#### 4. Singlet Oxygen Efficiency

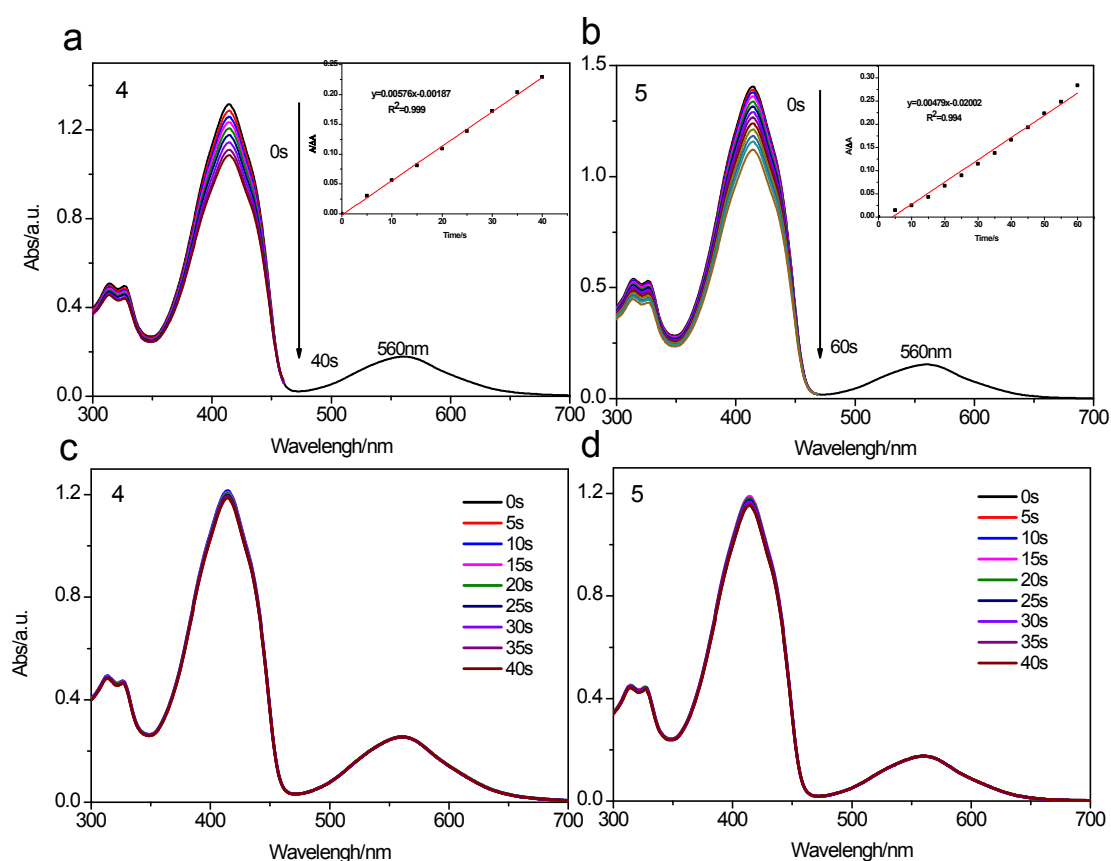

**Fig. S2.** Changes in the absorption spectra (a, b) of DPBF upon laser illumination (525 nm, 0.23 W) in the presence of **4**(a) , **5**(b) with 5 s interval in DCM, the absorption intensity of DPBF (~417 nm) decrease gradually as the laser irradiation time increase, indicating that  $^1\text{O}_2$  is continuously produced over time. Changes in the absorption spectra (c, d) of DPBF upon laser illumination (525 nm, 0.23 W) in the presence of **4**(c), **5**(d) after deoxygenation with 5 s interval in DCM.

#### 5. NTO analyses

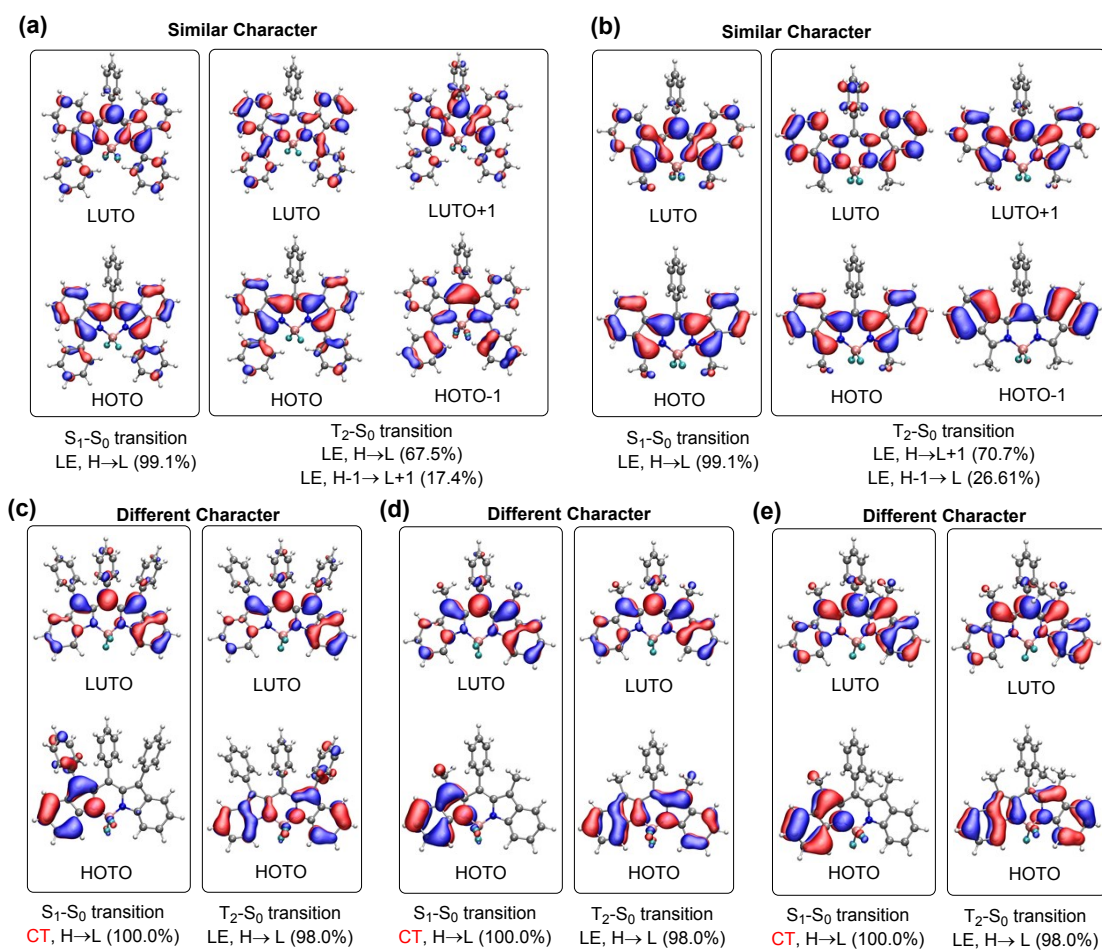

**Fig. S3** Natural transition orbital (NTO) analyses for  $S_1$  and  $T_2$  states of the studied compounds. HOTO: highest occupied transition orbital, LUTO: lowest unoccupied transition orbital.

## 5. $^1\text{H}$ NMR, $^{13}\text{C}$ NMR and HR MS Spectrum



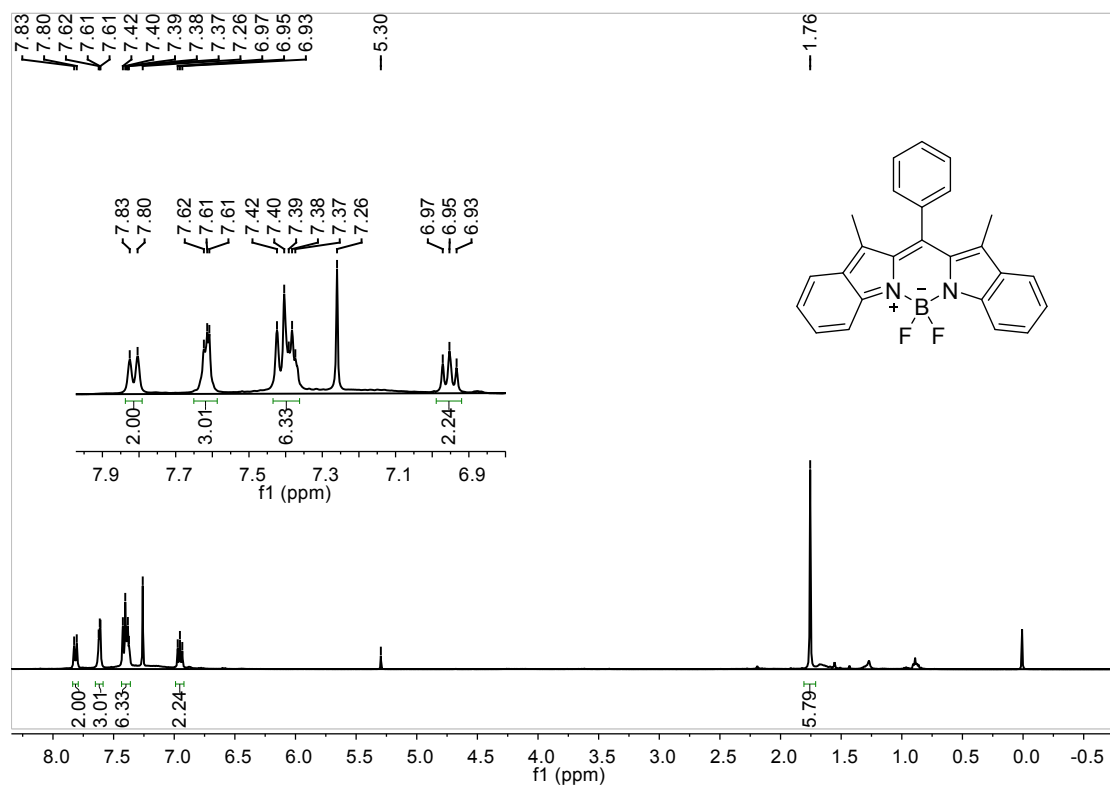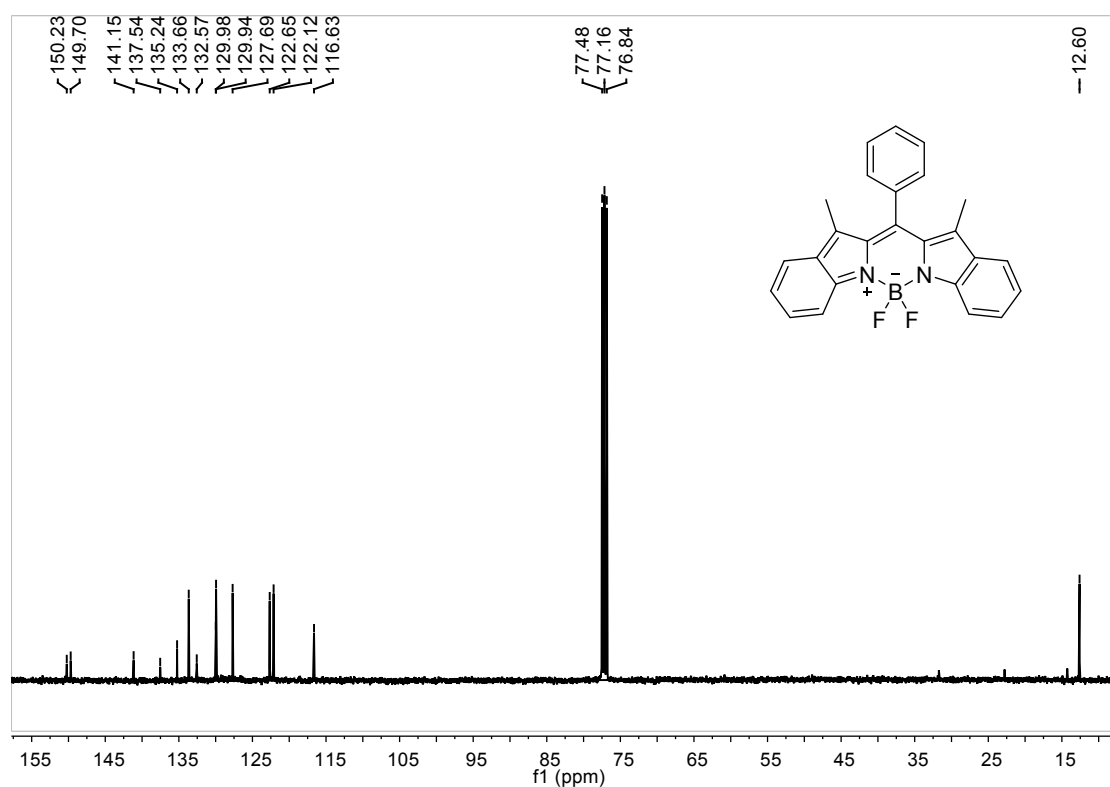

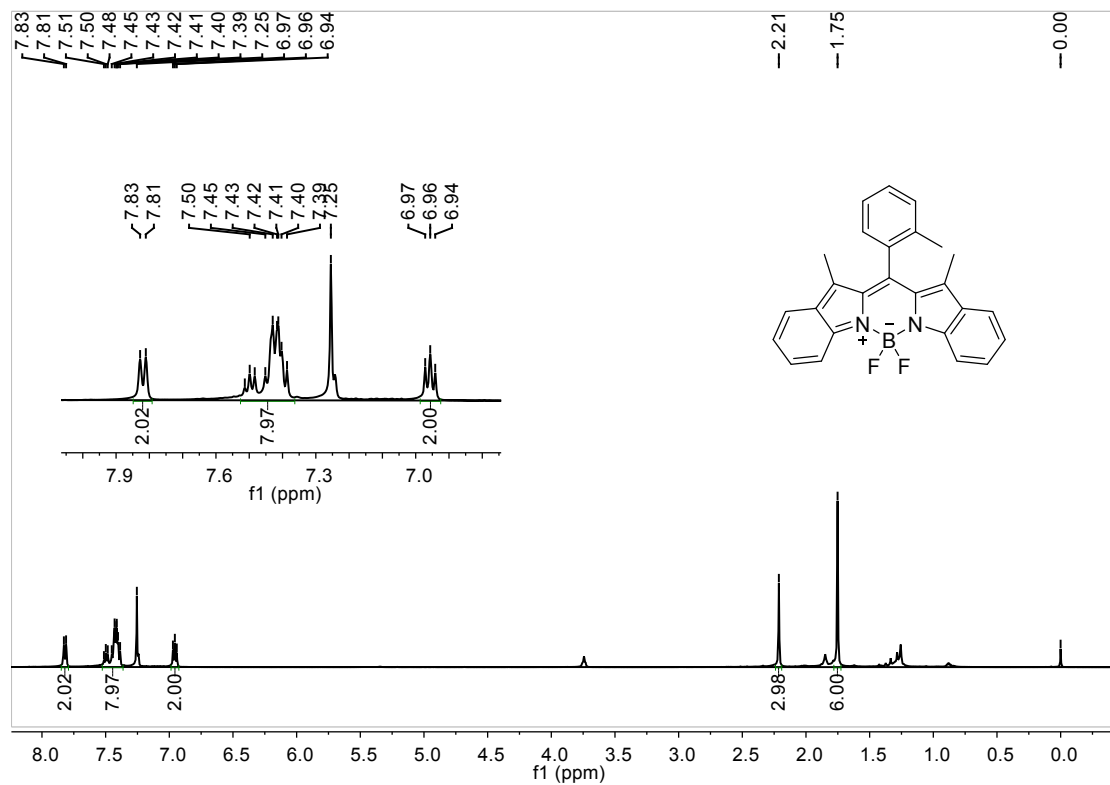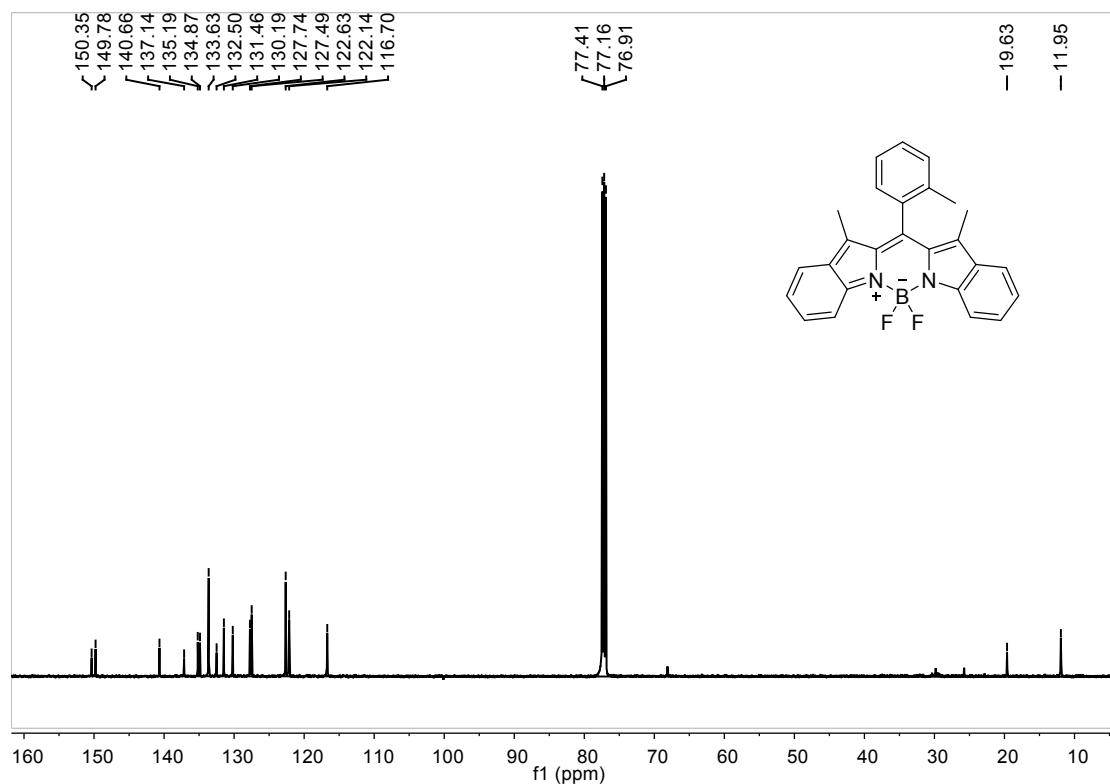

## Mass Spectrum SmartFormula Report

### Analysis Info

Analysis Name D:\Data\Q-TOF-LUH-201105-xn-C25\_01.d  
 Method APCI-POS-200-750-190704.m  
 Sample Name  
 Comment

Acquisition Date 12/18/2020 4:12:40 PM  
 Operator BDAL@DE  
 Instrument / Ser# microTOF-Q II 228888.10  
 324

### Acquisition Parameter

|             |          |                       |           |                  |           |
|-------------|----------|-----------------------|-----------|------------------|-----------|
| Source Type | APCI     | Ion Polarity          | Positive  | Set Nebulizer    | 0.8 Bar   |
| Focus       | Active   | Set Capillary         | 4500 V    | Set Dry Heater   | 200 °C    |
| Scan Begin  | 100 m/z  | Set End Plate Offset  | -500 V    | Set Dry Gas      | 2.0 l/min |
| Scan End    | 1100 m/z | Set Collision Cell RF | 180.0 Vpp | Set Divert Valve | Source    |

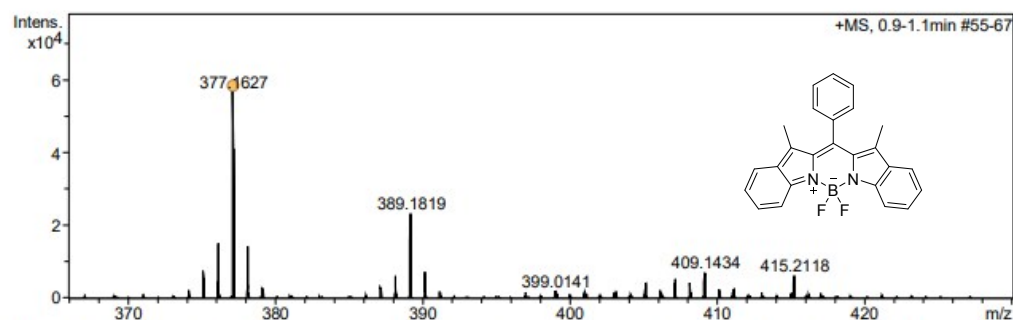

| Meas. m/z | # | Ion Formula | m/z      | err [ppm] | mSigma | # Sigma | Score  | rdb  | e <sup>-</sup> Conf | N-Rule |
|-----------|---|-------------|----------|-----------|--------|---------|--------|------|---------------------|--------|
| 377.1627  | 1 | C25H19BFN2  | 377.1624 | -0.8      | 21.4   | 1       | 100.00 | 17.5 | even                | ok     |

## Mass Spectrum SmartFormula Report

### Analysis Info

Analysis Name D:\Data\Q-TOF-LUH-20210313-XN-Me\_RC4\_01\_1821.d  
 Method esi-100.m  
 Sample Name Q-TOF-LUH-20210313-XN-Me  
 Comment

Acquisition Date 3/15/2021 2:24:11 PM  
 Operator BDAL@DE  
 Instrument / Ser# microTOF-Q II 228888.10  
 324

### Acquisition Parameter

|             |          |                       |           |                  |           |
|-------------|----------|-----------------------|-----------|------------------|-----------|
| Source Type | ESI      | Ion Polarity          | Positive  | Set Nebulizer    | 0.9 Bar   |
| Focus       | Active   | Set Capillary         | 4800 V    | Set Dry Heater   | 220 °C    |
| Scan Begin  | 100 m/z  | Set End Plate Offset  | -500 V    | Set Dry Gas      | 3.2 l/min |
| Scan End    | 1000 m/z | Set Collision Cell RF | 180.0 Vpp | Set Divert Valve | Source    |

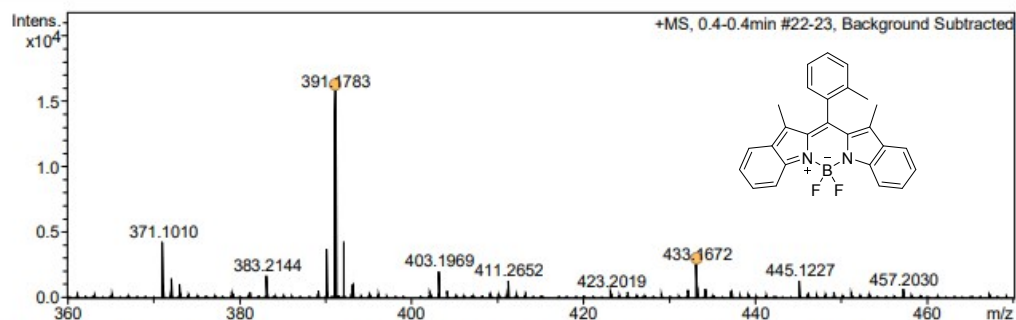

| Meas. m/z | # | Ion Formula   | m/z      | err [ppm] | mSigma | # Sigma | Score  | rdb  | e <sup>-</sup> Conf | N-Rule |
|-----------|---|---------------|----------|-----------|--------|---------|--------|------|---------------------|--------|
| 391.1783  | 1 | C26H21BFN2    | 391.1781 | -0.5      | 15.1   | 1       | 100.00 | 17.5 | even                | ok     |
| 433.1672  | 1 | C26H21BF2N2Na | 433.1663 | 2.3       | 19.9   | 1       | 100.00 | 16.5 | even                | ok     |

## 7. The Cartesian coordinates of the optimized geometries

|     |             |             |             |
|-----|-------------|-------------|-------------|
| (1) |             |             |             |
| C   | -1.20640400 | 1.00281200  | 0.11865800  |
| N   | -1.25415800 | -0.38372500 | 0.12868800  |
| B   | -0.00011500 | -1.29478700 | -0.00045000 |
| N   | 1.25417600  | -0.38386900 | -0.12829100 |
| C   | 1.20660800  | 1.00265400  | -0.11842800 |
| C   | 0.00014000  | 1.69894400  | 0.00008200  |
| C   | -2.55356100 | 1.49644600  | 0.16306200  |
| C   | -3.39329300 | 0.35162000  | 0.15722000  |
| C   | -2.55280800 | -0.80320500 | 0.10722000  |
| C   | 2.55277900  | -0.80355900 | -0.10680800 |
| C   | 3.39342200  | 0.35117300  | -0.15678900 |
| C   | 2.55384000  | 1.49610500  | -0.16275100 |
| C   | 0.00020700  | 3.17933600  | -0.00001600 |
| C   | 0.05563000  | 3.88361000  | 1.20250500  |
| C   | 0.05624700  | 5.27279200  | 1.20201500  |
| C   | 0.00033800  | 5.96930000  | -0.00019400 |
| C   | -0.05564100 | 5.27264400  | -1.20231300 |
| C   | -0.05515900 | 3.88346000  | -1.20262700 |
| C   | -3.10664600 | 2.77849600  | 0.22086500  |
| C   | -4.48674200 | 2.90352000  | 0.29226700  |
| C   | -5.31374000 | 1.77307500  | 0.32573600  |
| C   | -4.78107700 | 0.49586000  | 0.26663800  |
| C   | 4.78122000  | 0.49526700  | -0.26617700 |
| C   | 5.31403000  | 1.77242100  | -0.32536800 |
| C   | 4.48717200  | 2.90296400  | -0.29200600 |
| C   | 3.10705800  | 2.77808900  | -0.22064000 |
| C   | -3.02545300 | -2.16929500 | 0.00429100  |
| C   | 3.02519100  | -2.16970000 | -0.00397500 |
| C   | -2.45002300 | -3.24907700 | 0.69498700  |
| C   | -2.98560200 | -4.52054900 | 0.57844300  |
| C   | -4.09270600 | -4.75647100 | -0.22981400 |
| C   | -4.66523200 | -3.69924300 | -0.93109800 |
| C   | -4.14385700 | -2.42319900 | -0.81375800 |
| C   | 4.14415000  | -2.42375300 | 0.81327600  |
| C   | 4.66530700  | -3.69989900 | 0.93043400  |
| C   | 4.09199800  | -4.75711400 | 0.22976500  |
| C   | 2.98432400  | -4.52105800 | -0.57768200 |
| C   | 2.44896800  | -3.24948600 | -0.69404400 |
| F   | 0.17401800  | -2.07939400 | 1.13705000  |
| F   | -0.17443600 | -2.07766200 | -1.13918900 |
| H   | 0.09918600  | 3.33300600  | 2.13612300  |
| H   | 0.10098200  | 5.81243600  | 2.14201500  |
| H   | 0.00039200  | 7.05408800  | -0.00026400 |

|   |             |             |             |
|---|-------------|-------------|-------------|
| H | -0.10032500 | 5.81217000  | -2.14238200 |
| H | -0.09876700 | 3.33274000  | -2.13617300 |
| H | -2.47992300 | 3.66058900  | 0.22102700  |
| H | -4.93014300 | 3.89212400  | 0.33855000  |
| H | -6.38781500 | 1.90007900  | 0.40944800  |
| H | -5.42634200 | -0.37292200 | 0.32198300  |
| H | 5.42641500  | -0.37356800 | -0.32149100 |
| H | 6.38812200  | 1.89927900  | -0.40907900 |
| H | 4.93068500  | 3.89151400  | -0.33835400 |
| H | 2.48042500  | 3.66024400  | -0.22090200 |
| H | -1.59091400 | -3.08048600 | 1.32807600  |
| H | -2.53088700 | -5.33806000 | 1.12810900  |
| H | -4.50196000 | -5.75713000 | -0.31966900 |
| H | -5.51355700 | -3.87383300 | -1.58458300 |
| H | -4.56644800 | -1.61459000 | -1.39857800 |
| H | 4.56737000  | -1.61517300 | 1.39768100  |
| H | 5.51408700  | -3.87457900 | 1.58330400  |
| H | 4.50109000  | -5.75785200 | 0.31946600  |
| H | 2.52897800  | -5.33855500 | -1.12684700 |
| H | 1.58946000  | -3.08081000 | -1.32658500 |

(2)

|   |             |             |             |
|---|-------------|-------------|-------------|
| C | 1.20850500  | -0.15432400 | 0.00053800  |
| N | 1.23594000  | -1.54841700 | 0.00057700  |
| B | 0.00000400  | -2.47238600 | 0.00091000  |
| N | -1.23593400 | -1.54842100 | 0.00049400  |
| C | -1.20850300 | -0.15432800 | 0.00052500  |
| C | -0.00000100 | 0.55094900  | 0.00065200  |
| C | 2.56846800  | 0.30099500  | 0.00001200  |
| C | 3.37974000  | -0.87305200 | -0.00048100 |
| C | 2.51009500  | -1.99227600 | -0.00008400 |
| C | -2.51008800 | -1.99228400 | -0.00015100 |
| C | -3.37973600 | -0.87306200 | -0.00048100 |
| C | -2.56846700 | 0.30098700  | 0.00005200  |
| C | -0.00000500 | 2.03068200  | 0.00061700  |
| C | -0.00023100 | 2.73520300  | -1.20318400 |
| C | -0.00023300 | 4.12441800  | -1.20279800 |
| C | -0.00001200 | 4.82103100  | 0.00051900  |
| C | 0.00021100  | 4.12450200  | 1.20388100  |
| C | 0.00021500  | 2.73528300  | 1.20436700  |
| C | 3.16070700  | 1.56477100  | -0.00009500 |
| C | 4.54877300  | 1.64911500  | -0.00073600 |
| C | 5.34466100  | 0.49511100  | -0.00123200 |
| C | 4.77433700  | -0.76860200 | -0.00109300 |

|   |             |             |             |
|---|-------------|-------------|-------------|
| C | -4.77433300 | -0.76861500 | -0.00104100 |
| C | -5.34466000 | 0.49509600  | -0.00107200 |
| C | -4.54877400 | 1.64910200  | -0.00051500 |
| C | -3.16070800 | 1.56476100  | 0.00006500  |
| C | 2.84416200  | -3.43018200 | -0.00098700 |
| C | -2.84415000 | -3.43019100 | -0.00101200 |
| F | 0.00005600  | -3.27821800 | -1.13971400 |
| F | -0.00004500 | -3.27737200 | 1.14225600  |
| H | -0.00040200 | 2.18458500  | -2.13781300 |
| H | -0.00040500 | 4.66393300  | -2.14396200 |
| H | -0.00001400 | 5.90582600  | 0.00048100  |
| H | 0.00038100  | 4.66408200  | 2.14500800  |
| H | 0.00039000  | 2.18473200  | 2.13903500  |
| H | 2.55850200  | 2.46490000  | 0.00028500  |
| H | 5.02304400  | 2.62428500  | -0.00085100 |
| H | 6.42501900  | 0.59398700  | -0.00173300 |
| H | 5.40005800  | -1.65504000 | -0.00153500 |
| H | -5.40005200 | -1.65505500 | -0.00151300 |
| H | -6.42501800 | 0.59397000  | -0.00152700 |
| H | -5.02304800 | 2.62427100  | -0.00052900 |
| H | -2.55850500 | 2.46489100  | 0.00050400  |
| H | 3.92412600  | -3.57832600 | 0.00477800  |
| H | 2.40300600  | -3.92490200 | 0.87140100  |
| H | 2.41317100  | -3.92165100 | -0.88037600 |
| H | -2.41270200 | -3.92178700 | -0.88010100 |
| H | -2.40344200 | -3.92478200 | 0.87168200  |
| H | -3.92411600 | -3.57833800 | 0.00423700  |

(3)

|   |           |           |           |
|---|-----------|-----------|-----------|
| C | 1.202933  | -0.623343 | -0.008641 |
| N | 1.156694  | -2.009104 | -0.141942 |
| B | -0.016285 | -2.863236 | 0.310030  |
| N | -1.281109 | -1.944983 | 0.156994  |
| C | -1.255108 | -0.562526 | 0.022922  |
| C | 0.027457  | 0.124617  | 0.048696  |
| C | 2.576186  | -0.210657 | -0.028628 |
| C | 3.338529  | -1.377306 | -0.246559 |
| C | 2.430982  | -2.474658 | -0.294334 |
| C | -2.563385 | -2.386077 | 0.156440  |
| C | -3.419438 | -1.271479 | 0.022004  |
| C | -2.558426 | -0.100034 | -0.091975 |
| C | 4.723826  | -1.613418 | -0.347088 |
| C | 5.160545  | -2.908131 | -0.511155 |
| C | 4.246132  | -3.981145 | -0.565791 |

|   |           |           |           |
|---|-----------|-----------|-----------|
| C | 2.882254  | -3.785398 | -0.452163 |
| C | -3.043625 | -3.695080 | 0.246841  |
| C | -4.429950 | -3.877361 | 0.210929  |
| C | -5.277710 | -2.792677 | 0.064220  |
| C | -4.777871 | -1.471195 | -0.048601 |
| C | 3.149453  | 1.114397  | 0.204400  |
| C | 0.033692  | 1.592060  | 0.093719  |
| C | -3.069755 | 1.240976  | -0.334722 |
| C | 4.056577  | 1.663698  | -0.707232 |
| C | 4.600865  | 2.923195  | -0.493524 |
| C | 4.256955  | 3.649310  | 0.639851  |
| C | 3.374566  | 3.101605  | 1.565901  |
| C | 2.830721  | 1.845772  | 1.354045  |
| C | 0.667400  | 2.337008  | -0.906134 |
| C | 0.665357  | 3.721807  | -0.865437 |
| C | 0.024299  | 4.388635  | 0.172863  |
| C | -0.616164 | 3.659950  | 1.168711  |
| C | -0.615674 | 2.274402  | 1.127390  |
| C | -4.086088 | 1.757649  | 0.481613  |
| C | -4.566194 | 3.042789  | 0.282347  |
| C | -4.055787 | 3.826120  | -0.747259 |
| C | -3.069392 | 3.312545  | -1.583518 |
| C | -2.583072 | 2.032500  | -1.383567 |
| F | 0.074000  | -3.234013 | 1.644089  |
| F | -0.184429 | -3.984786 | -0.496699 |
| H | 5.424243  | -0.788161 | -0.283715 |
| H | 6.222289  | -3.113790 | -0.592323 |
| H | 4.625411  | -4.989329 | -0.695195 |
| H | 2.179617  | -4.607507 | -0.490939 |
| H | -2.353930 | -4.526098 | 0.317510  |
| H | -4.838941 | -4.877539 | 0.287837  |
| H | -6.349870 | -2.950845 | 0.028260  |
| H | -5.461396 | -0.641158 | -0.190711 |
| H | 4.305873  | 1.106503  | -1.604488 |
| H | 5.291720  | 3.340742  | -1.218765 |
| H | 4.677556  | 4.635616  | 0.804474  |
| H | 3.107220  | 3.658054  | 2.457853  |
| H | 2.143387  | 1.419908  | 2.075908  |
| H | 1.162086  | 1.815109  | -1.717528 |
| H | 1.169953  | 4.282513  | -1.644782 |
| H | 0.023423  | 5.472892  | 0.205560  |
| H | -1.121393 | 4.173234  | 1.979827  |
| H | -1.113529 | 1.705916  | 1.905726  |
| H | -4.459407 | 1.158498  | 1.305643  |

|   |           |          |           |
|---|-----------|----------|-----------|
| H | -5.333974 | 3.439033 | 0.938385  |
| H | -4.427666 | 4.833614 | -0.899594 |
| H | -2.672642 | 3.915816 | -2.392502 |
| H | -1.820356 | 1.629676 | -2.037847 |

(4)

|   |           |           |           |
|---|-----------|-----------|-----------|
| C | 1.221734  | 0.287297  | -0.001896 |
| N | 1.223368  | -1.106885 | -0.065464 |
| B | 0.051726  | -1.981405 | 0.344830  |
| N | -1.229405 | -1.110590 | 0.079782  |
| C | -1.236902 | 0.286996  | -0.016080 |
| C | 0.029190  | 0.997191  | 0.031855  |
| C | 2.575953  | 0.750104  | 0.007431  |
| C | 3.382616  | -0.396553 | -0.093407 |
| C | 2.518802  | -1.531475 | -0.125351 |
| C | -2.492182 | -1.578496 | -0.022799 |
| C | -3.362803 | -0.476632 | -0.188685 |
| C | -2.527934 | 0.720972  | -0.203913 |
| C | 4.778541  | -0.585184 | -0.145976 |
| C | 5.270145  | -1.868673 | -0.218714 |
| C | 4.399088  | -2.978113 | -0.240383 |
| C | 3.024643  | -2.829289 | -0.193011 |
| C | -2.950358 | -2.899125 | 0.021180  |
| C | -4.330151 | -3.109618 | -0.093578 |
| C | -5.189991 | -2.039514 | -0.253280 |
| C | -4.709971 | -0.701105 | -0.305177 |
| C | 3.091563  | 2.138027  | 0.140952  |
| C | -0.008171 | 2.470079  | 0.057677  |
| C | -3.069328 | 2.088086  | -0.414987 |
| C | 0.378212  | 3.215746  | -1.059107 |
| C | 0.306803  | 4.602098  | -1.042091 |
| C | -0.149747 | 5.264056  | 0.092239  |
| C | -0.536230 | 4.531318  | 1.209494  |
| C | -0.471332 | 3.145048  | 1.190872  |
| F | 0.061978  | -2.297021 | 1.696876  |
| F | -0.030235 | -3.139321 | -0.423941 |
| H | 5.450545  | 0.266371  | -0.130818 |
| H | 6.340811  | -2.036328 | -0.261574 |
| H | 4.820254  | -3.976243 | -0.298116 |
| H | 2.355523  | -3.679446 | -0.219043 |
| H | -2.247660 | -3.715729 | 0.124930  |
| H | -4.721158 | -4.119223 | -0.061135 |
| H | -6.256045 | -2.215602 | -0.343981 |
| H | -5.412714 | 0.115873  | -0.431824 |



|   |           |          |           |
|---|-----------|----------|-----------|
| H | 2.498344  | 2.729848 | 0.840980  |
| H | 4.122819  | 2.114545 | 0.501405  |
| H | 3.088091  | 2.680048 | -0.811798 |
| H | -3.994422 | 2.041224 | -0.995952 |
| H | -3.304832 | 2.575701 | 0.538849  |
| H | -2.364942 | 2.735416 | -0.936386 |
| H | 0.723281  | 2.693066 | -1.945145 |
| H | 0.605459  | 5.168008 | -1.918346 |
| H | -0.203752 | 6.347312 | 0.105996  |
| H | -0.886230 | 5.042761 | 2.100099  |
| H | -0.768570 | 2.569368 | 2.061499  |

(5)

|   |           |           |           |
|---|-----------|-----------|-----------|
| C | 1.207716  | 0.122072  | -0.117166 |
| N | 1.146286  | -1.268340 | -0.051173 |
| B | -0.090687 | -2.065568 | 0.315961  |
| N | -1.309564 | -1.134409 | -0.034403 |
| C | -1.245142 | 0.264202  | -0.096834 |
| C | 0.059047  | 0.897339  | -0.112305 |
| C | 2.578648  | 0.518599  | -0.233016 |
| C | 3.331003  | -0.668132 | -0.231530 |
| C | 2.416580  | -1.759349 | -0.117186 |
| C | -2.600269 | -1.530566 | -0.099621 |
| C | -3.416126 | -0.378461 | -0.179830 |
| C | -2.520426 | 0.774372  | -0.165447 |
| C | 4.713277  | -0.930909 | -0.322239 |
| C | 5.142874  | -2.237865 | -0.289062 |
| C | 4.222963  | -3.300941 | -0.170767 |
| C | 2.860016  | -3.081168 | -0.084886 |
| C | -3.127387 | -2.824921 | -0.073996 |
| C | -4.520750 | -2.958082 | -0.136310 |
| C | -5.327271 | -1.839050 | -0.216251 |
| C | -4.777866 | -0.526593 | -0.234593 |
| C | 3.135988  | 1.890471  | -0.366367 |
| C | 0.124167  | 2.374696  | -0.147456 |
| C | -2.999448 | 2.179373  | -0.230754 |
| C | -0.015357 | 3.047576  | -1.360787 |
| C | 0.024977  | 4.434053  | -1.415659 |
| C | 0.201266  | 5.158411  | -0.243813 |
| C | 0.337831  | 4.493114  | 0.968197  |
| C | 0.303136  | 3.101304  | 1.040175  |
| F | -0.173143 | -2.337991 | 1.675853  |
| F | -0.196258 | -3.240422 | -0.422743 |
| H | 5.424377  | -0.116479 | -0.411595 |

|   |           |           |           |
|---|-----------|-----------|-----------|
| H | 6.202242  | -2.460623 | -0.355328 |
| H | 4.595981  | -4.319440 | -0.149738 |
| H | 2.153174  | -3.897094 | -0.008493 |
| H | -2.465638 | -3.680147 | -0.025853 |
| H | -4.964025 | -3.946331 | -0.124545 |
| H | -6.404253 | -1.954938 | -0.264949 |
| H | -5.440427 | 0.331264  | -0.284408 |
| H | 2.950021  | 2.503181  | 0.521912  |
| H | 4.216043  | 1.842884  | -0.518288 |
| H | 2.697908  | 2.431655  | -1.209761 |
| H | -4.001572 | 2.256678  | 0.199911  |
| H | -2.340844 | 2.867228  | 0.298229  |
| H | -3.060968 | 2.529608  | -1.268337 |
| H | -0.150849 | 2.465469  | -2.266945 |
| H | -0.079350 | 4.944974  | -2.366842 |
| H | 0.232862  | 6.242543  | -0.271429 |
| H | 0.473467  | 5.063767  | 1.882259  |
| C | 0.455520  | 2.390700  | 2.352047  |
| H | -0.354113 | 1.672076  | 2.509574  |
| H | 1.387391  | 1.816838  | 2.385217  |
| H | 0.459764  | 3.098219  | 3.183380  |
